# Supplementary material
Source: publisher site journal article supplement (https://www.dovepress.com/article/328033)
Supplement: Supplementary file 1 [file get_supplementary_file.php]

**Table 1.** Comparison of Pain medication prescriptions before (Period 1 / 2) and after (Period 4 / 5) diagnostic imaging

| Opioids | | | | NSAID | | | |
| --- | --- | --- | --- | --- | --- | --- | --- |
|  | Period 1 & 2 | Period 4 & 5 | P |  | Period 1 & 2 | Period 4 & 5 | P |
| Prescriptions, *n* | 22 670 | 20 627 |  |  | 72 575 | 55 576 |  |
| Fentanyl | 1455 (6.4) | 1969 (9.5) | <0.001 | Indometacin | 126 (0.2) | 123 (0.2) | 0.063 |
| Morphine | 1114 (4.9) | 1376 (6.7) | <0.001 | Diclofenac | 16 114 (22.2) | 10 603 (19.1) | <0.001 |
| Hydromorphone | 64 (0.3) | 157 (0.8) | <0.001 | Etodolac | 1139 (1.6) | 1010 (1.8) | 0.001 |
| Nicomorphine | 1 (0.0) | 0 (0.0) | 1 | Ketorolac | 1410 (1.9) | 1011 (1.8) | 0.112 |
| Dihydrocodeine | 68 (0.3) | 67 (0.3) | 0.706 | Diclofenac combinations | 661 (0.9) | 535 (1.0) | 0.354 |
| Oxycodone and naloxone | 1470 (6.5) | 2074 (10.1) | <0.001 | Ibuprofen | 28 374 (39.1) | 22 230 (40.0) | 0.001 |
| Codeine, combinations | 2125 (9.4) | 871 (4.2) | <0.001 | Naproxen | 1135 (1.6) | 862 (1.6) | 0.872 |
| Pathidine | 400 (1.8) | 384 (1.9) | 0.471 | Naproxen / Esomeprazole combination | 2597 (3.6) | 2107 (3.8) | 0.046 |
| Buprenorphine | 265 (1.2) | 345 (1.7) | <0.001 | Mefenamic acid | 6341 (8.7) | 5126 (9.2) | 0.003 |
| Nalbuphine | 4 (0.0) | 7 (0.0) | 0.447 | Celecoxib | 1384 (1.9) | 1365 (2.5) | <0.001 |
| Tramadol and paracetamol | 3429 (15.1) | 2936 (14.2) | 0.009 | Diclofenac topical | 13 294 (18.3) | 10 604 (19.1) | 0.001 |
| Tilidine | 14 (0.1) | 20 (0.1) | 0.257 |  |  |  |  |
| Tramadol | 11 722 (51.7) | 9641 (46.7) | <0.001 |  |  |  |  |
| Tapentadol | 539 (2.4) | 780 (3.8) | <0.001 |  |  |  |  |

Numbers are presented as absolute prescriptions and percentage (in parenthesis). NSAID, non-steroidal anti-inflammatory drug.

**Table 2**. Comparison of prescribed pain medications (in Defined Daily Doses) in the year before (time Period 1 / 2) and after (time Period 4 / 5) diagnostic imaging depending on the used diagnostic imaging method

| Time Period | 1 / 2 | 4 / 5 | P |
| --- | --- | --- | --- |
| X-ray | | | |
| NSAID | 15.00 [10.00, 36.67] | 15.00 [10.00, 45.00] | 0.019 |
| Paracetamol | 18.67 [6.67, 42.00] | 20.00 [8.00, 40.00] | 0.043 |
| Opioids | 4.67 [3.33, 14.00] | 6.67 [3.33, 18.33] | <0.001 |
| MRI | | | |
| NSAID | 16.67 [10.00, 45.00] | 16.67 [10.00, 50.00] | <0.001 |
| Paracetamol | 16.67 [8.00, 39.00] | 18.67 [6.67, 38.67] | 0.707 |
| Opioids | 4.67 [3.33, 14.00] | 6.67 [3.33, 18.67] | <0.001 |
| CT | | | |
| NSAID | 15.00 [10.00, 45.00] | 15.00 [10.00, 50.00] | 0.630 |
| Paracetamol | 18.67 [6.67, 46.67] | 21.33 [6.67, 46.67] | 0.108 |
| Opioids | 6.67 [3.33, 16.67] | 8.00 [3.33, 23.33] | 0.032 |
| X-ray / MRI | | | |
| NSAID | 16.67 [10.00, 45.00] | 20.00 [10.00, 50.00] | <0.001 |
| Paracetamol | 18.67 [8.33, 40.00] | 24.67 [10.67, 43.33] | 0.038 |
| Opioids | 4.67 [3.33, 14.00] | 8.00 [3.33, 20.00] | <0.001 |
| X-ray / CT | | | |
| NSAID | 16.67 [10.00, 50.00] | 16.67 [10.00, 50.00] | 0.211 |
| Paracetamol | 26.67 [10.67, 46.83] | 33.33 [13.33, 66.67] | 0.093 |
| Opioids | 6.67 [3.33, 16.67] | 10.00 [3.33, 26.67] | 0.003 |

Numbers were presented as median and interquartile range (in parenthesis). NSAID, non-steroidal anti-inflammatory drug; MRI, Magnetic Resonance Imaging; CT, computed tomography scan.

**Table 3**. Baseline characteristics in patients with and without non-pharmacologic therapies

|  | NPT = No | NPT = Yes | P |
| --- | --- | --- | --- |
| N | 18 320 | 42 039 |  |
| Age, mean (SD) | 52.42 (16.94) | 54.10 (16.49) | <0.001 |
| Sex, *n* (%)  Female  Male | 8896 (48.6)  9424 (51.4) | 25 081 (59.7)  16 958 (40.3) | <0.001 |
| Number of comorbidities, mean (SD) | 0.28 (0.57) | 0.34 (0.63) | <0.001 |
| Managed Care=Yes, *n* (%) | 11 065 (60.4) | 25 310 (60.2) | 0.663 |
| Insurance type, n (%) |  |  | 0.080 |
| Free choice model | 7255 (39.6) | 16 729 (39.8) |  |
| Network model | 2832 (15.5) | 6769 (16.1) |  |
| Family Physician model | 4857 (26.5) | 11 076 (26.3) |  |
| Telemedicine model | 3376 (18.4) | 7465 (17.8) |  |

NPT, non-pharmacologic treatment; SD, Standard deviation; n, number of patients

**Table 4**. Comparison of prescriptions and prescribed Defined Daily Doses in patients with and without a non-pharmacologic therapies

|  | NPT = no | NPT = yes | P |
| --- | --- | --- | --- |
| NSAIDs | | | |
| DDD | 15.00 [10.00, 45.00] | 17.16 [10.00, 50.00] | <0.001 |
| Prescriptions | 1.22 (0.65) | 1.24 (0.65) | <0.001 |
| Opioids | | | |
| DDD | 4.67 [3.33, 14.00] | 6.67 [3.33, 20.00] | <0.001 |
| Prescriptions | 1.43 (1.15) | 1.47 (1.20) | 0.001 |
| Paracetamol | | | |
| DDD | 16.00 [6.67, 33.67] | 26.67 [11.33, 52.67] | <0.001 |
| Prescriptions | 1.38 (0.92) | 1.42 (0.96) | <0.001 |

DDD are presented as median [IQR]. Prescriptions are presented as mean (SD). NPT, non-pharmacologic treatment; DDD, defined daily doses; IQR, interquartile range, SD, standard deviation.

Appendix 1: Used ATC Codes

| Pain medications | | |
| --- | --- | --- |
| NSAIDS (M01A) | | |
|  | Celecoxib | M01AH01 |
|  | Diclofenac | M01AB05 |
|  | Diclofenac topical | M02AA15 |
|  | Diclofenac combinations | M01AB55 |
|  | Etodolac | M01AB08 |
|  | Ibuprofen | M01AE01 |
|  | Ibuprofen topical | M02AA13 |
|  | Ibuprofen combinations | M01AE51 |
|  | Ibuprofen + Oxicodone | N02AJ19 |
|  | Indomethacin | M01AB01 |
|  | Mefenamic Acid | M01AG01 |
|  | Naproxen | M01AE02 |
|  | Naproxen topical | M02AA12 |
|  | Naproxen + Esomeprazole | M01AE52 |
|  | Naproxen + Misoprostol | M01AE56 |
|  | Ketorolac | M01AB15 |
| Paracetamol | | |
|  | Paracetamol | N02BE01 |
|  | Paracetamol combinations | N02BE71 |
| Opioids (N02A) | | |
|  | Dihydrocodeine | N02AA08 |
|  | Codeine (combinations) | N02AA59 |
|  | Tilidine | N02AX01 |
|  | Tramadol | N02AX02 |
|  | Tapentadol | N02AX06 |
|  | Tramadol combinations | N02AJ15 |
|  | Tramadol paracetamol | N02AJ13 |
|  | Morphine | N02AA01 |
|  | Morphine combinations | N02AA51 |
|  | Hydromorphone | N02AA03 |
|  | Hydromorphone combinations | N02AA53 |
|  | Nicomorphine | N02AA04 |
|  | Oxycodone | N02AA05 |
|  | Oxycodone + ASS | N02AJ18 |
|  | Oxycodone + Ibuprofen | N02AJ19 |
|  | Oxycodone +Paracetamol | N02AJ17 |
|  | Oxycodone + Naloxon | N02AA55 |
|  | Pethidine | N02AB02 |
|  | Pethidine combinations | N02AG03 |
|  | Fentanyl systemic | N01AH01 |
|  | Fentanyl topic | N02AB03 |
|  | Fentanyl combinations | N01AH51 |
|  | Buprenorphine | N02AE01 |
|  | Nalbuphine | N02AF02 |
|  | Methadone combinations | N02AC52 |
|  | Piritramid | N02AC03 |

| Proton pump inhibitors(A02BC) | | |
| --- | --- | --- |
|  | Omeprazole | A02BC01 |
|  | Pantoprazole | A02BC02 |
|  | Lansoprazole | A02BC03 |
|  | Rabeprazole | A02BC04 |
|  | Esomeprazole | A02BC05 |
|  | Vonoprazan | A02BC08 |

Exclusion codes:

1) PCG codes

- ABH: Addiction
- KHO: Hormone sensitive tumors
- KRE: Cancer
- KRK: Cancer complex
- RHE: Rheumatism
- SMC: Chronic pain
- SMN: Neuropathic pain

2) Back surgery, defined by the following DRG Codes.

"B02B","B02C","B03B","B03C","B18Z","B20A","B20C","B20E","B61A","B61B","B61C","I06A","I06C","I09A","I09C","I09D","I09E","I10A",

"I10C","I45A","I45B","I68A","I68B","I68C","I68E","I68F"
